# Supplementary material for: Can Different Forest Structures Lead to Different Levels of Therapeutic Effects? A Systematic Review and Meta-Analysis
Source: MDPI journal article supplement (doi:10.3390/healthcare9111427), 2021-10-23

Figure S1. Result of Sensitivity Analysis

3.3.1. Emotional Restoration

*Anxiety*

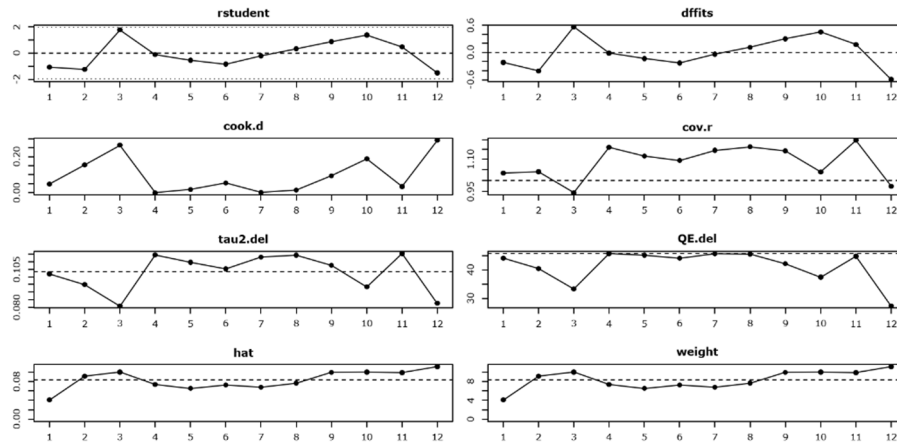

*Depression*

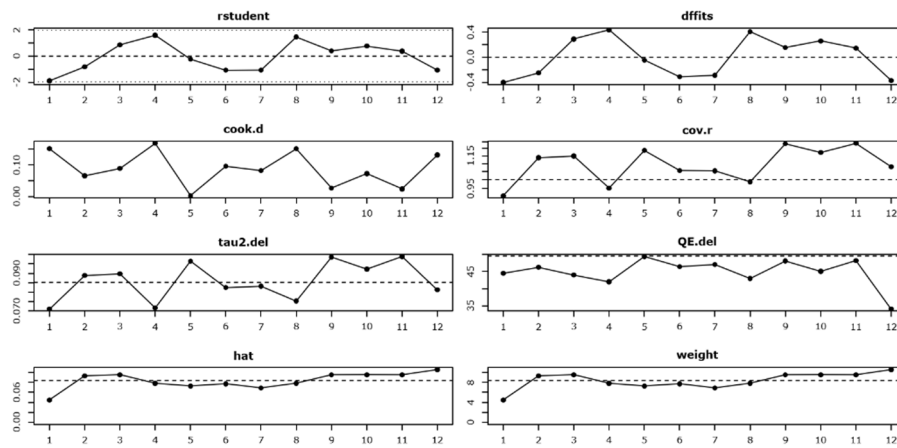

*Anger*

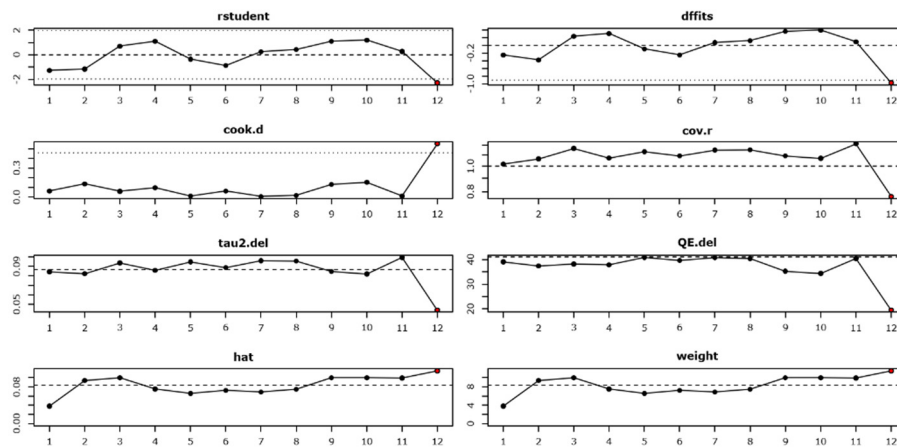

Fatigue

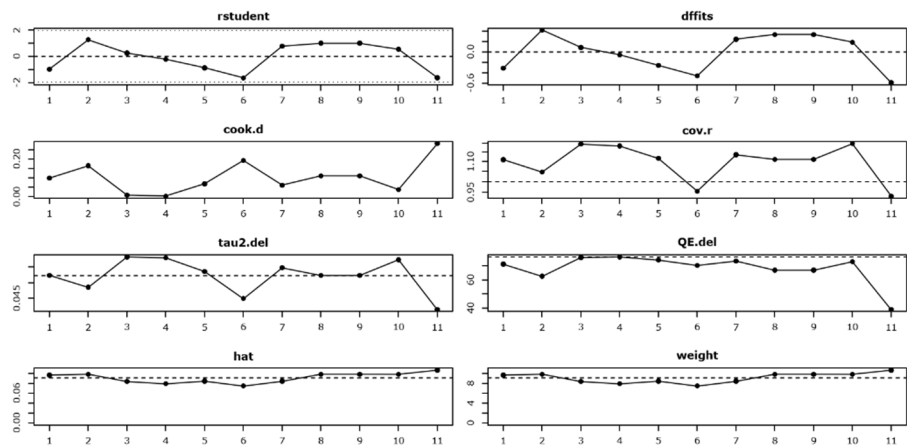

Vigor

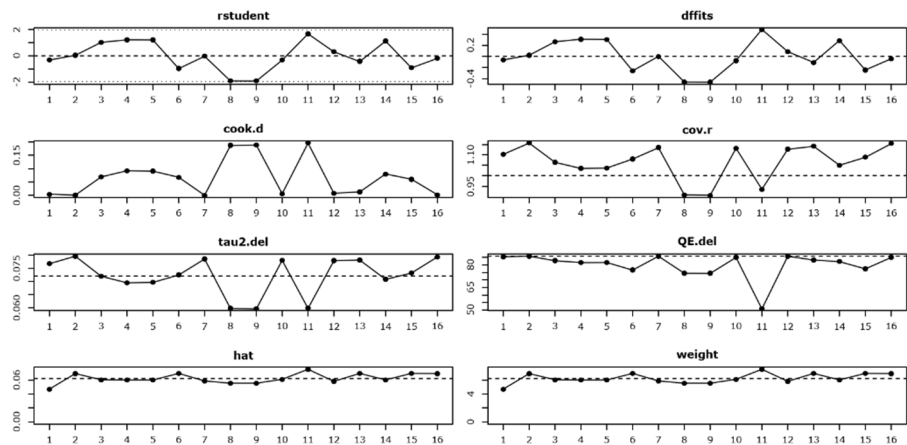

Negative Affect

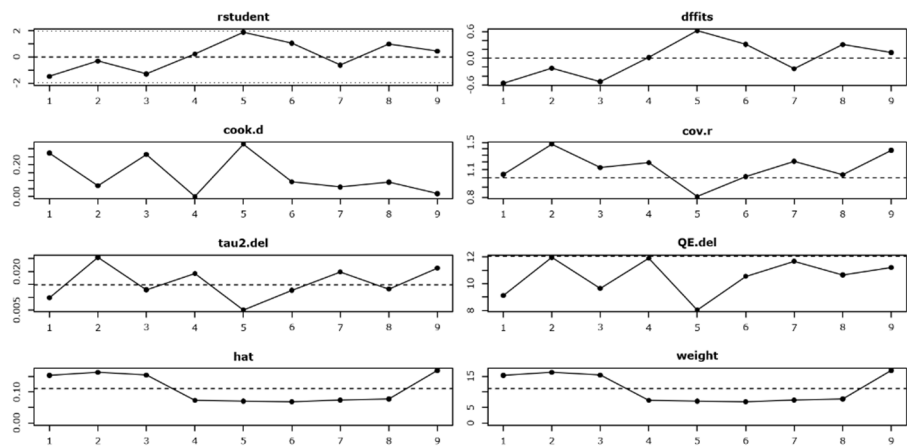

## Positive Affect

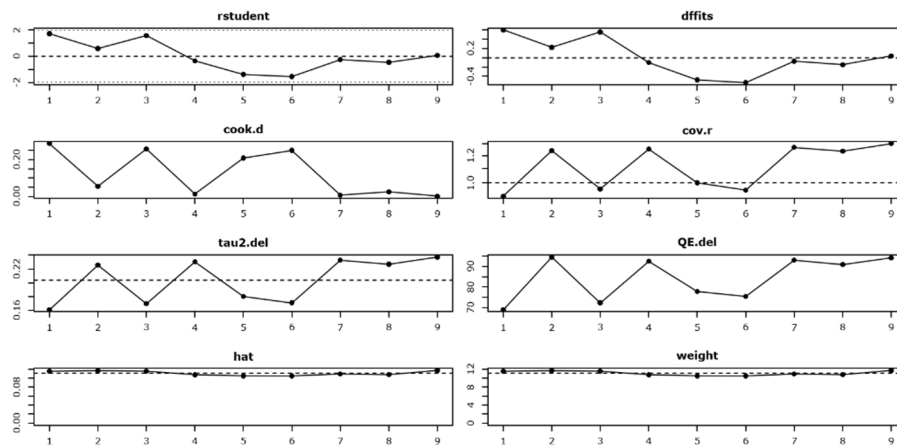

### 3.3.2. Cognitive Restoration

#### Restorative experience

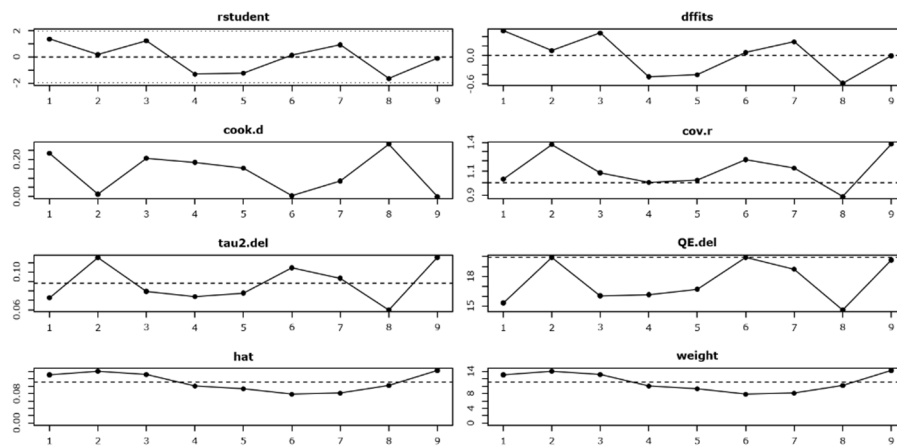

### 3.3.3. Physiological Relaxation

#### Diastolic Blood Pressure

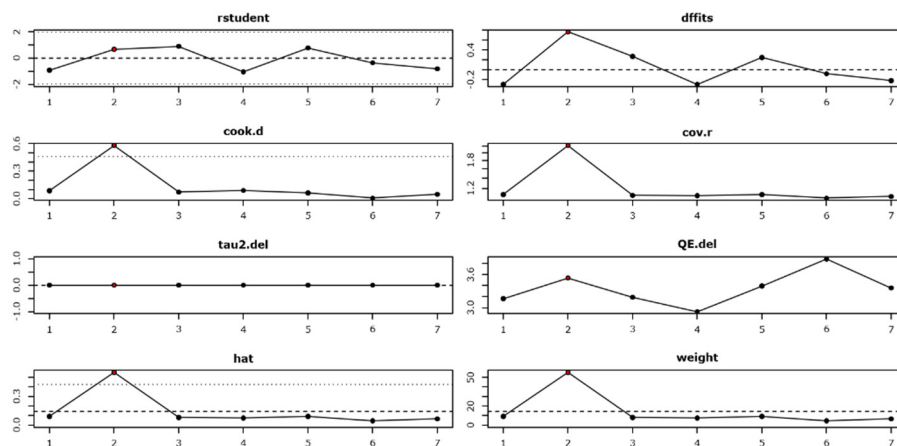

Systolic Blood Pressure

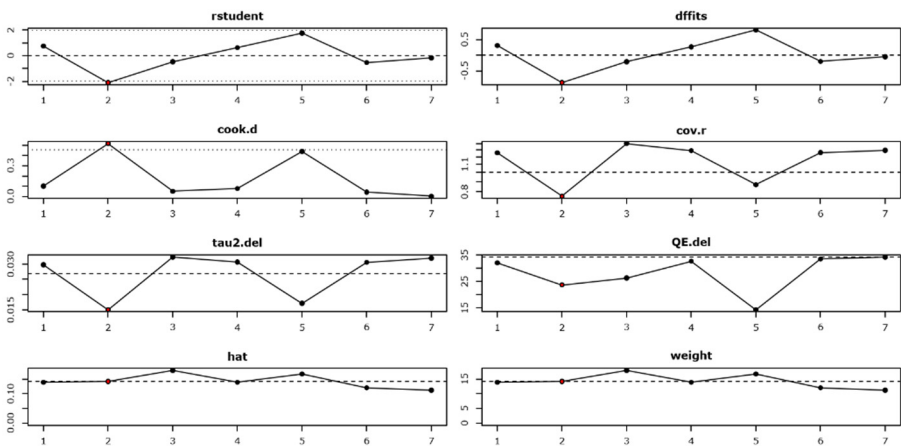

Heart Rate or Pulse Rate

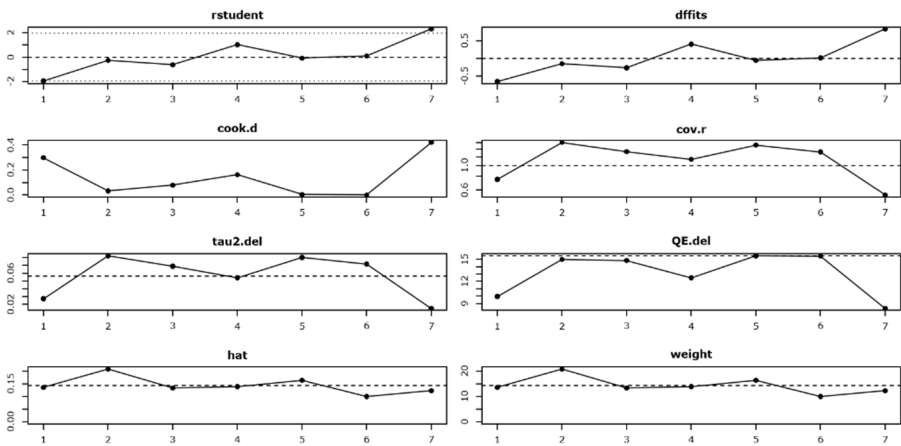

### 3.4.1. Physiological Relaxation

#### *Diastolic Blood Pressure*

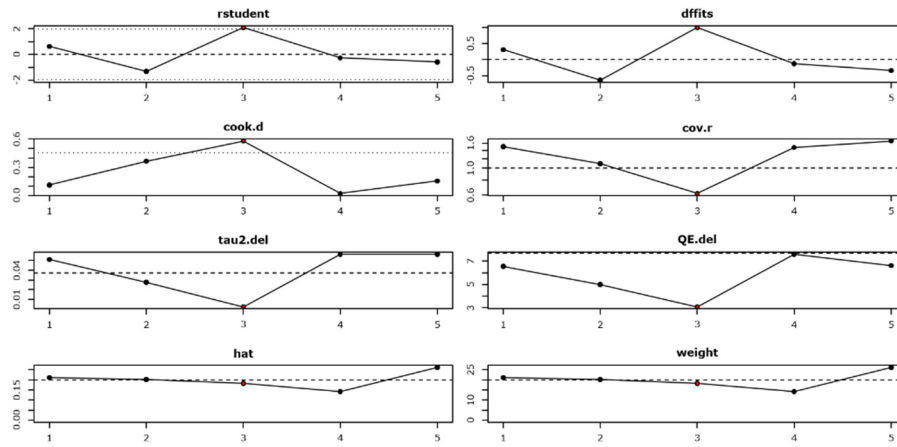

#### *Systolic Blood Pressure*

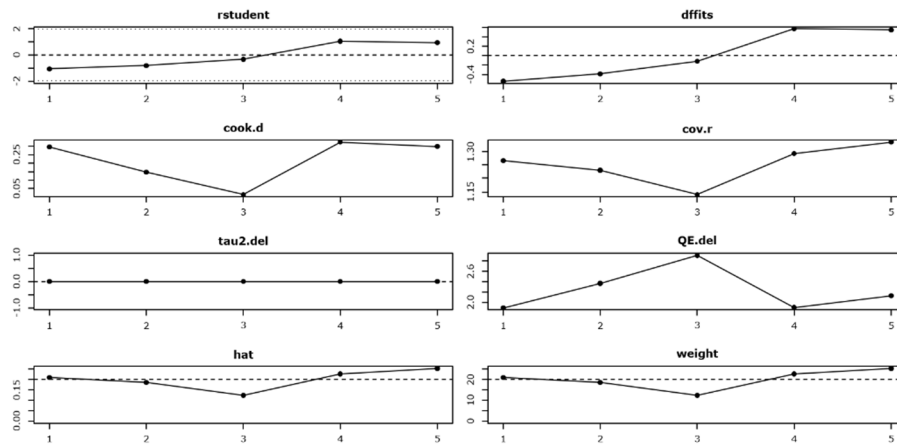

#### *Heart Rate or Pulse Rate*

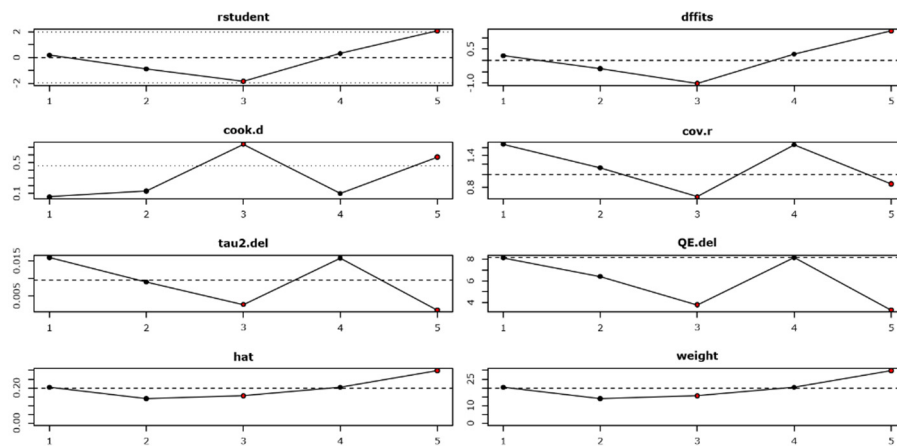

Supplement: s1 [file s1]
